# Supplementary material
Source: ML conference proceedings conference paper supplement (https://openreview.net/forum?id=vDybC2brXKh)
Supplement: supplementary_material [file attachment]

# THE ADVERSARIAL REGULATION OF THE TEMPORAL DIFFERENCE LOSS COSTS MORE THAN EXPECTED

Anonymous authors

Paper under double-blind review

## 1 SUPPLEMENTARY MATERIAL

### 1.1 OVERESTIMATION, INACCURACIES AND INCONSISTENCIES IN ADVERSARIAL TRAINING: RADIAL

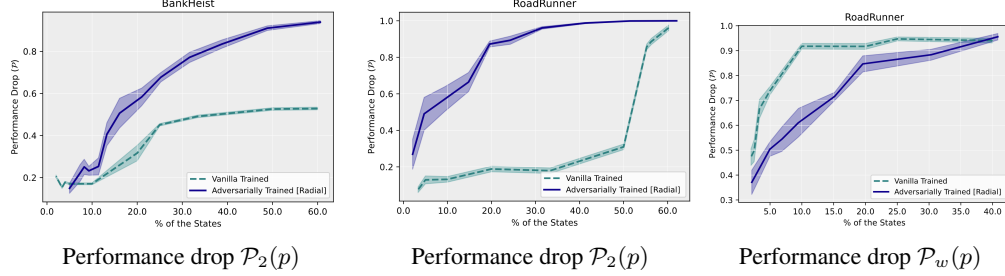

Figure 1: Left: Performance drop  $\mathcal{P}_2(p)$  with respect to action modification  $a_2$  for RADIAL adversarially trained deep neural policies Oikarinen et al. (2021) and vanilla trained policies for BankHeist. Center: Performance drop  $\mathcal{P}_2(p)$  with respect to action modification  $a_2$  for RADIAL adversarially trained deep neural policies Oikarinen et al. (2021) and vanilla trained policies for RoadRunner. Right: Performance drop  $\mathcal{P}_w(p)$  with respect to action modification  $a_w$  for the RADIAL adversarially trained deep neural policy and the vanilla trained deep neural policy.

The left and center column of Figure 1 demonstrate the performance drop  $\mathcal{P}_2(p)$  with respect to action modification  $a_2$  for the RADIAL adversarially trained deep reinforcement learning policy proposed by Oikarinen et al. (2021) and the vanilla trained deep reinforcement learning policy in BankHeist and RoadRunner respectively. The right column of the Figure 1 demonstrates the performance drop  $\mathcal{P}_w(p)$  with respect to action modification  $a_w$  for the RADIAL adversarially trained deep reinforcement learning policy proposed by Oikarinen et al. (2021) and the vanilla trained deep reinforcement learning policy in RoadRunner. Again the results in Figure 1 demonstrate that the vanilla training technique has better estimates for state-action values compared to the adversarial training method RADIAL, quite recently proposed by Oikarinen et al. (2021).

In particular, the curve for  $\mathcal{P}_2(p)$  for RADIAL in RoadRunner lies well above the corresponding vanilla training curve. This implies that, while taking the second best action has a relatively mild effect on the vanilla-trained policy, it causes a dramatic loss in performance for RADIAL. Similarly, the  $\mathcal{P}_w(p)$  curve for RADIAL in RoadRunner lies above the corresponding curve for the vanilla-trained policy. This again implies that the vanilla-trained policy has a better estimate for which action will

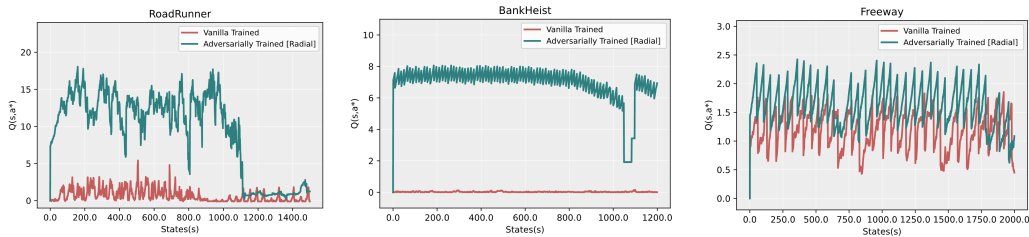

Figure 2:  $Q$ -value of the best action  $a^*$  over the states for the RADIAL adversarially trained deep neural policy proposed by Oikarinen et al. (2021) and vanilla trained deep neural policy.

lead to lowest rewards than the RADIAL adversarially trained policy. The results reported in Figure 1 again demonstrate the loss of information in the state-action value function due to adversarial regulation of the temporal difference loss.

Figure 2 demonstrates that the overestimation bias discussed in the main body of our submission is again an issue for a newer adversarial training technique quite recently published in NeurIPS 2021. Furthermore, exactly as the previous adversarial training methods, RADIAL also learns inaccurate, inconsistent and overestimated state-action value functions. Hence, these results once more demonstrate the loss of information in the state-action value function as a novel fundamental trade-off intrinsic to adversarial training.

### 1.2 SUPPLEMENTARY RESULTS ON INCONSISTENCIES IN ACTION RANKING IN ADVERSARIALLY TRAINED DEEP NEURAL POLICIES

As we mentioned in Section 6.1 of the main body of the paper the inaccuracies of the state-action value function reach a high enough level for the state-of-the-art adversarially trained deep neural policies such that the ranking of the sub-optimal actions is not correct anymore. This can be seen in Figure 3 in the  $\mathcal{P}_2$  and  $\mathcal{P}_w$  results. Note that  $\mathcal{P}_2$  represents the performance drop (Definition 4.2) with action modification  $a_2$ , and  $\mathcal{P}_w$  (Definition 4.2) represents the action modification with  $a_w$ .

Thus, it can be observed from Figure 3 that the performance drop  $\mathcal{P}_2$  with action modification  $a_2$  is higher than the performance drop  $\mathcal{P}_w$  with action modification  $a_w$ . In more detail  $\mathcal{P}_2$  0.18257-dominates  $\mathcal{P}_w$  (Definition 4.3). This demonstrates that the state-of-the-art adversarially trained deep neural policies are not ranking the sub-optimal actions correctly. Note that as we discussed in the main body of the paper in Section 6.1 this poses a problem for learning optimal state-action value functions Lin & Zhou (2020); Alshiekh et al. (2018).

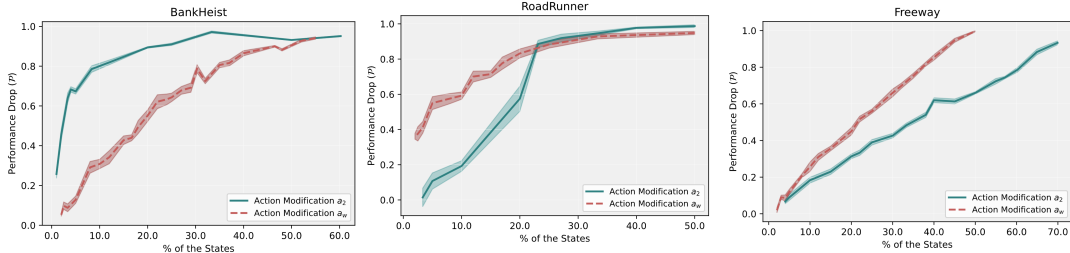

Figure 3: Consistency results for ranked actions via performance drop  $\mathcal{P}_2$  and  $\mathcal{P}_w$  for the state-of-the-art adversarially trained deep neural policies.

### 1.3 OVERESTIMATION OF STATE-ACTION VALUES

In this section we provide supplementary results for the overestimation bias caused by state-of-the-art adversarially trained deep neural policies. In particular, in Section 6.3 of the main body of the paper we explained the problem of overestimation of state-action values. Furthermore, in Section 6.2 we empirically demonstrate that state-of-the-art adversarially trained deep neural policies overestimate the state-action values. In this section we further provide results on state-action values of the optimal action for vanilla and adversarially trained deep neural policies when  $p_{a_2}$  is equal to 0.1, 0.2 and 0.3 respectively. Note that in the main body of the paper we claim that the reason for this overestimation lies in the fact that the state-of-the-art deep neural policy adversarial training is solely an extension of adversarial training in image classification tasks, which is based on penalizing the wrong “label”. However, this approach does not directly correspond to deep neural policies. The correct label in image classification can be connected to the optimal action in deep neural policies in this analogy. However, the wrong label does not correspond to sub-optimal actions. An optimal  $Q$ -function represents the discounted expected cumulative rewards received when taking an action  $a$  in state  $s$ . Hence, the sub-optimal actions have much more meaning in collecting rewards than solely misclassifying an image.

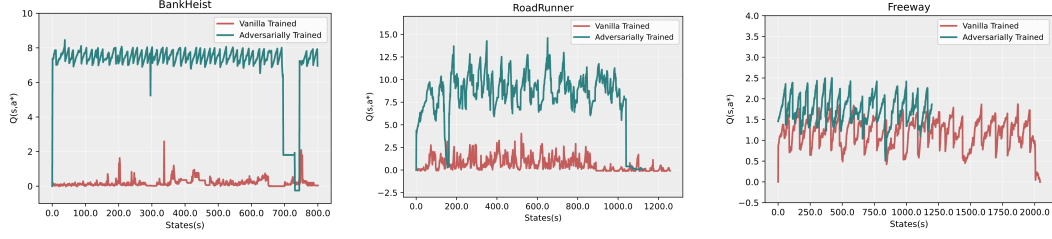

Figure 4: State-action values of the best action  $Q(s, a^*)$  for vanilla trained deep neural policies and adversarially trained deep neural policies when  $p_{a_2}$  is 0.1.

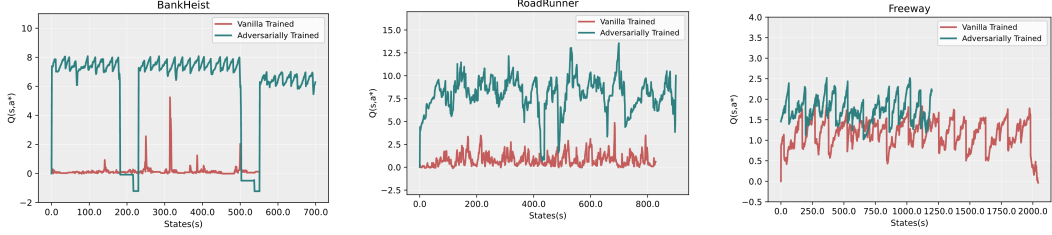

Figure 5: State-action values of the best action  $Q(s, a^*)$  for vanilla trained deep neural policies and adversarially trained deep neural policies when  $p_{a_2}$  is 0.2.

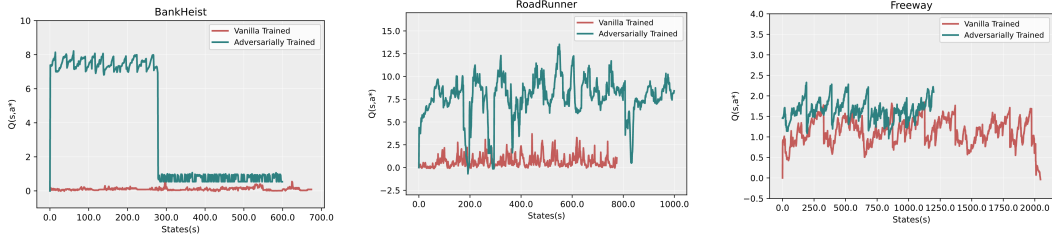

Figure 6: State-action values of the best action  $Q(s, a^*)$  for vanilla trained deep neural policies and adversarially trained deep neural policies when  $p_{a_2}$  is 0.3.

#### 1.4 SUPPLEMENTARY RESULTS ON ACTION GAP

In Section 6.4 of the main body of our paper we discuss the action gap phenomenon introduced by Farahmand (2011). Note that the action gap is defined as  $\kappa(Q, s) = \max_{a' \in A} Q(s, a') - \max_{a \notin \arg \max_{a' \in A} Q(s, a')} Q(s, a)$ . Further, we argue that both the existence of overestimation of state action values and the higher action gap in state-of-the-art adversarially trained deep neural policies demonstrates that the hypothesis of Bellemare et al. (2016) cannot be true. In this section we provide supplementary results on the action gap without the normalization  $Q(s, a) / \sum_a |Q(s, a)|$ . In particular, Figure 7, Figure 8 and Figure 9 show the action gap for the vanilla trained deep neural policies and state-of-the-art adversarial deep neural policies when  $p_{a_2}$  is 0, 0.1 and 0.2 respectively. Hence, the action gap for adversarially trained deep neural policies is higher than for vanilla trained deep neural policies.

#### 1.5 SUPPLEMENTARY RESULTS ON ACTION GAP WITH NORMALIZED STATE-ACTION VALUES

In the remainder of this section we provide additional results on normalized state-action values for adversarially trained and vanilla trained deep neural policies.

In more detail, Figure 10 and Figure 11 show the normalized state-action values of the optimal action, second best action  $a_2$  and worst action  $a_w$  for vanilla trained deep neural policies and adversarially trained deep neural policies when  $p_{a_2}$  is 0.01 and 0.1 respectively. Thus, Figure 10 and Figure 11 demonstrate that the action gap is higher for the state-of-the-art adversarially trained deep neural

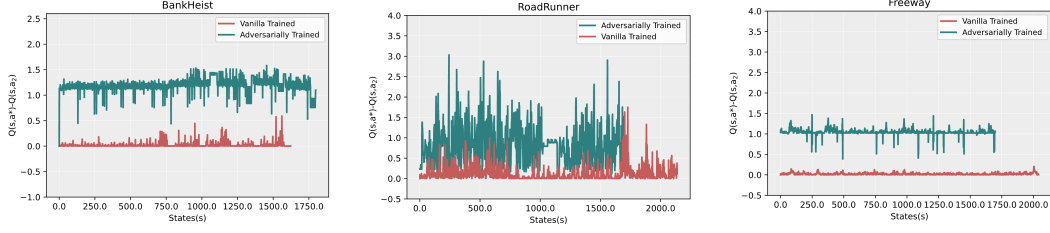

Figure 7: The action gap  $Q(s, a^*) - Q(s, a_2)$  for the state-of-the-art adversarially trained deep neural policies and vanilla trained deep neural policies for  $p_{a_2}$  is 0.

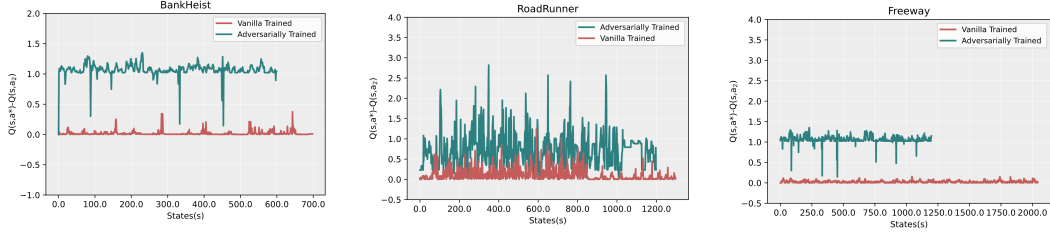

Figure 8: The action gap  $Q(s, a^*) - Q(s, a_2)$  for state-of-the-art adversarially trained deep neural policies and vanilla trained deep neural policies for  $p_{a_2}$  is 0.1.

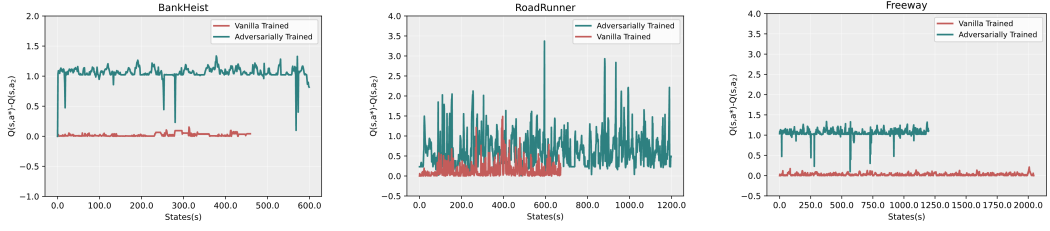

Figure 9: The action gap  $Q(s, a^*) - Q(s, a_2)$  for state-of-the-art adversarially trained deep neural policies and vanilla trained deep neural policies for  $p_{a_2}$  is 0.2.

policies compared to vanilla trained deep neural policies. Note that the state-action values in Figure 10 and Figure 11 are normalized  $Q$ -values (i.e. normalized via  $Q(s, a) / \sum_a |Q(s, a)|$ ).

## 1.6 IMPLEMENTATION DETAILS

Note that to be able to provide a fair comparison State-Adversarial Double Deep Q-Network and Double Deep Q-Network are the exact same implementations described in SA-DDQN paper described in Section 3 and Wang et al. (2016) respectively. In more detail for Double Deep Q-Network the batch size is 32, discount factor  $\gamma$  is 1, buffer size 50000, learning rate is  $5 \times 10^{-5}$  for the Adam optimizer, and random action probability is 0.02. Note that experience replay Schaul et al. (2016) is utilized. More details can be found in Dhariwal et al. (2017) and Wang et al. (2016) on Double Deep Q-Networks. The state-of-the-art adversarial deep neural policy is the exact same implementation as in the SA-DDQN paper. Adversarial deep neural policies are trained via experience replay as well Schaul et al. (2016). Note that State-Adversarial Double Deep Q-Network is trained via the regularizer  $\mathcal{R}(\theta) = \sum_s (\max_{\bar{s} \in D_\epsilon(s)} \max_{a \neq a^*(s)} Q_\theta(\bar{s}, a) - Q_\theta(\bar{s}, a^*(s)))$  where  $a^*(s) = \arg \max_a Q(s, a)$  inside  $\epsilon$ -ball  $D_\epsilon(s) = \{\bar{s} : \|s - \bar{s}\|_\infty \leq \epsilon\}$ . Hence, this  $\epsilon$  is set to  $1/255$ . Note that the regularization is added to the temporal difference loss in the  $Q$ -update. The regularization parameter of state-adversarial is  $\kappa \in \{0.005, 0.01, 0.02\}$ . The initial  $1.5 \times 10^6$  frames are trained without regularization.

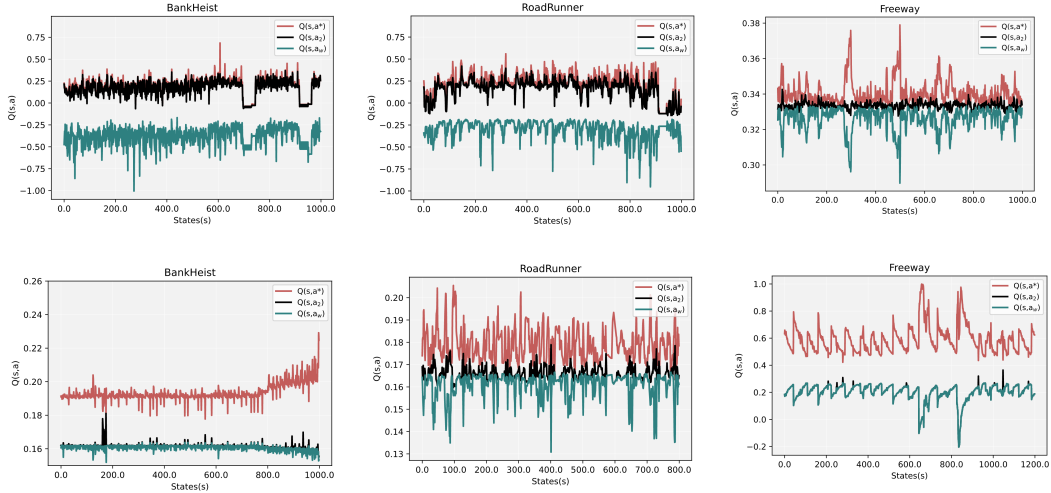

Figure 10: Normalized state-action values for the best action  $a^*$ , second best action  $a_2$  and worst action  $a_w$  over states when  $p_{a_2}$  is 0.01. Row1: Vanilla trained deep neural policies. Row2: State-of-the-art adversarially trained deep neural policies.

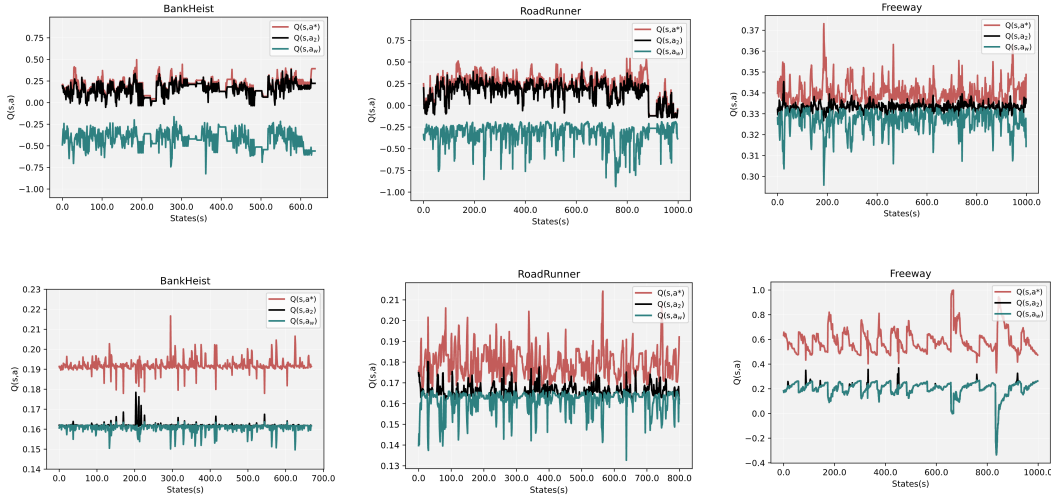

Figure 11: Normalized state-action values for the best action  $a^*$ , second best action  $a_2$  and worst action  $a_w$  over states when  $p_{a_2}$  is 0.1. Row1: Vanilla trained deep neural policies. Row2: State-of-the-art adversarially trained deep neural policies.

## REFERENCES

Mohammed Alshiekh, Roderick Bloem, Rüdiger Ehlers, Bettina Könighofer, Scott Niekum, and Ufuk Topcu. Safe reinforcement learning via shielding. In Sheila A. McIlraith and Kilian Q. Weinberger (eds.), *Proceedings of the Thirty-Second AAAI Conference on Artificial Intelligence, (AAAI-18), the 30th innovative Applications of Artificial Intelligence (IAAI-18), and the 8th AAAI Symposium on Educational Advances in Artificial Intelligence (EAAI-18), New Orleans, Louisiana, USA, February 2-7, 2018*, pp. 2669–2678. AAAI Press, 2018.

Marc G. Bellemare, Georg Ostrovski, Arthur Guez, Philip S. Thomas, and Rémi Munos. Increasing the action gap: New operators for reinforcement learning. In Dale Schuurmans and Michael P. Wellman (eds.), *Proceedings of the Thirtieth AAAI Conference on Artificial Intelligence, February 12-17, 2016, Phoenix, Arizona, USA*, pp. 1476–1483. AAAI Press, 2016.

- Prafulla Dhariwal, Christopher Hesse, Oleg Klimov, Alex Nichol, Matthias Plappert, Alec Radford, John Schulman, Szymon Sidor, Yuhuai Wu, and Peter Zhokhov. Openai baselines. <https://github.com/openai/baselines>, 2017.
- Amir Massoud Farahmand. Action-gap phenomenon in reinforcement learning. *Advances in Neural Information Processing Systems (NeurIPS)*, 2011.
- Kaixiang Lin and Jiayu Zhou. Ranking policy gradient. In *8th International Conference on Learning Representations, ICLR 2020, Addis Ababa, Ethiopia, April 26-30, 2020*. OpenReview.net, 2020.
- Tuomas P. Oikarinen, Wang Zhang, Alexandre Megretski, Luca Daniel, and Tsui-Wei Weng. Robust deep reinforcement learning through adversarial loss. In *Advances in Neural Information Processing Systems 34: Annual Conference on Neural Information Processing Systems 2021, NeurIPS 2021, December 6-14, 2021, virtual*, pp. 26156–26167, 2021.
- Tom Schaul, John Quan, Ioannis Antonoglou, and David Silver. Prioritized experience replay. *International Conference on Learning Representations (ICLR)*, 2016.
- Ziyu Wang, Tom Schaul, Matteo Hessel, Hado Van Hasselt, Marc Lanctot, and Nando. De Freitas. Dueling network architectures for deep reinforcement learning. *International Conference on Machine Learning ICML*, pp. 1995–2003, 2016.
